# Supplementary material
Source: PubMed Central journal article supplement (PMC5664409)
Supplement: 2017.167312.HEIDENREICH_SUPPL.pdf [file 2017.167312.HEIDENREICH_SUPPL.pdf]

**Mass spectrometry-based identification of a naturally presented receptor tyrosine kinase-like orphan receptor 1-derived epitope recognized by CD8<sup>+</sup> cytotoxic T cells**

Falk Heidenreich,<sup>1,2</sup> Elke Rücker-Braun,<sup>2,3</sup> Juliane S. Walz,<sup>4</sup> Anne Eugster,<sup>3</sup> Denise Kühn,<sup>3</sup> Sevina Dietz,<sup>3</sup> Annika Nelde,<sup>4,5</sup> Antje Tunger,<sup>6,7</sup> Rebekka Wehner,<sup>6,7</sup> Cornelia S. Link,<sup>2,3</sup> Jan M. Middeke,<sup>2</sup> Friedrich Stölzel,<sup>2</sup> Torsten Tonn,<sup>8</sup> Stefan Stevanovic,<sup>5,9,10</sup> Hans-Georg Rammensee,<sup>5,9,10</sup> Ezio Bonifacio,<sup>3</sup> Michael Bachmann,<sup>3,7,10,11,12</sup> Matthias Zeis,<sup>13</sup> Gerhard Ehninger,<sup>2,3,7,10,11</sup> Martin Bornhäuser,<sup>2,3,7,10,11</sup> Johannes Schetelig<sup>1,2</sup> and Marc Schmitz<sup>3,6,7,10,11</sup>

*JS and MS contributed equally to this work.*

<sup>1</sup>DKMS German Bone Marrow Donor Center, Clinical Trials Unit, Dresden; <sup>2</sup>Department of Medicine I, University Hospital of Dresden; <sup>3</sup>Center for Regenerative Therapies Dresden, TU Dresden; <sup>4</sup>Department of Hematology and Oncology, University of Tübingen; <sup>5</sup>Department of Immunology, Institute for Cell Biology, University of Tübingen; <sup>6</sup>Institute of Immunology, Medical Faculty Carl Gustav Carus, TU Dresden; <sup>7</sup>National Center for Tumor Diseases, University Hospital Carl Gustav Carus, TU Dresden; <sup>8</sup>German Red Cross Blood Donation Service North-East, Dresden; <sup>9</sup>German Cancer Consortium (DKTK), Tübingen; <sup>10</sup>German Cancer Research Center (DKFZ), Heidelberg; <sup>11</sup>German Cancer Consortium (DKTK), Dresden; <sup>12</sup>Department of Radioimmunology, Institute of Radiopharmaceutical Cancer Research, Helmholtz Center Dresden-Rossendorf, Dresden and <sup>13</sup>Städtisches Krankenhaus Kiel, Germany

Correspondence: falk.heidenreich@uniklinikum-dresden.de

doi:10.3324/haematol.2017.167312

## Supplemental Tables

**Supplemental Table 1.** Mass spectrometry-based identification of ROR1-derived peptide NPRYPNYMF.

| Sample         | HLA type                                                   | cell count             | DDA method with 20% share for first sample validation |      |          |             |                    | NPRYNYMF identification |            | mass spectrometer            |
|----------------|------------------------------------------------------------|------------------------|-------------------------------------------------------|------|----------|-------------|--------------------|-------------------------|------------|------------------------------|
|                |                                                            |                        | peptide IDs                                           | PSMs | proteins | binders IDs | purity (% binders) | DDA method              | PRM method |                              |
| CLL_1          | A*01:01; A*03:01;<br>B*07:02; B*44:02                      | 1.8 x 10 <sup>8</sup>  | 2664                                                  | 5137 | 2266     | 2336        | 88%                | Yes                     | not used   | LTQ Orbitrap<br>Fusion Lumos |
| CLL_2          | A*03:01; A*30:01;<br>B*07:02; B*13:02;<br>C*06:02; C*07:02 | 64.0 x 10 <sup>8</sup> | 1183                                                  | 1261 | 1229     | 902         | 91%                | Yes                     | not used   | LTQ Orbitrap XL              |
| 786-0          | A*03:01;<br>B*07:02; B*44:02;<br>C*05:01; C*07:02          | 2.3 x 10 <sup>8</sup>  | 2915                                                  | 7125 | 2364     | 2652        | 91%                | Yes                     | Yes        | LTQ Orbitrap<br>Fusion Lumos |
| NIH:<br>OVCAR3 | A*02:01; A*29:02;<br>B*07:02; B*58:01;<br>C*07:02          | 2.0 x 10 <sup>8</sup>  | 1546                                                  | 4103 | 1476     | 1031        | 67%                | No                      | Yes        | LTQ Orbitrap<br>Fusion Lumos |

DDA: data-dependent acquisition (a top speed CID fragmentation method). PRM: parallel reaction monitoring. PSM: peptide-spectrum match.

**Supplemental Table 2.** NPRYPNYMF-peptide binding scores for HLA-B\*07:02 determined by four different binding prediction software tools.

| <b>Name of database</b> | <b>Score</b>           | <b>Binding attribute</b> | <b>URL</b>                                                                                        |
|-------------------------|------------------------|--------------------------|---------------------------------------------------------------------------------------------------|
| SYFPEITHI               | Score:<br>21           | 64% of max. score        | <a href="http://syfpeithi.de/">http://syfpeithi.de/</a>                                           |
| Rankpep                 | Score:<br>21.301       | 'predicted binder'       | <a href="http://imed.med.ucm.es/Tools/rankpep.html">http://imed.med.ucm.es/Tools/rankpep.html</a> |
| NetMHC 4.0              | %rank:<br>0.15         | 'strong binding peptide' | <a href="http://www.cbs.dtu.dk/services/NetMHC/">http://www.cbs.dtu.dk/services/NetMHC/</a>       |
| IEDB                    | Percentile_rank<br>0.5 | 'good binder'            | <a href="http://tools.iedb.org/mhci/">http://tools.iedb.org/mhci/</a>                             |

The top score for the NPRYPNYMF-peptide was designated to HLA-B\*07:02 in all four tested online-prediction tools.

**Supplemental Table 3.** Amino acid sequences of TCR CDR3  $\alpha$  and  $\beta$  regions of ROR1-specific CD8<sup>+</sup> T-cell clones.

| Clone | TRAV      | AA sequence CDR3- $\alpha$ | TRAJ  |        |
|-------|-----------|----------------------------|-------|--------|
| XB6   | 29/DV5*01 | <u>CAGPPLHGGYQKVTF</u>     | 13*01 |        |
| XD8   | 12-2*01   | <u>CAVNAGSQGNLIF</u>       | 42*01 |        |
| Clone | TRBV      | AA sequence CDR3- $\beta$  | TRBD  | TRBJ   |
| XB6   | 20-1*01   | <u>CSARTSGGYEQYF</u>       | 2*01  | 2-7*01 |
| XD8   | 6-6*01    | <u>CASSFTIGQGNSPLHF</u>    | 1*01  | 1-6*01 |

CDR3 DNA sequence encoding amino acids between the last cysteine of the V- and the conserved phenylalanine in the J-segment was analyzed. Underlined amino acid sequences are encoded by the respective V- or J-gene segment.

# Supplemental Figures

Supplemental Figure 1. ROR1 mRNA expression in normal B lymphocytes and CLL cells.

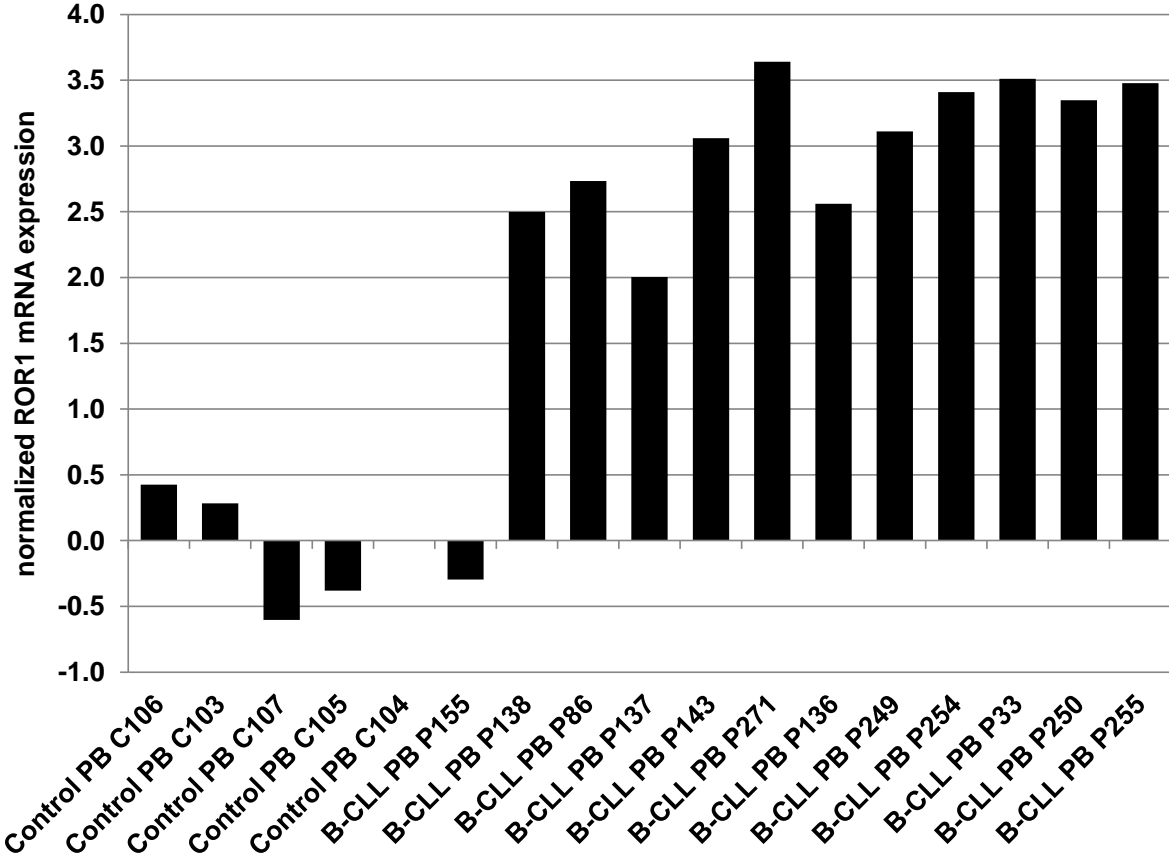

**Supplemental Figure 2.** ROR1 expression in human healthy tissues.

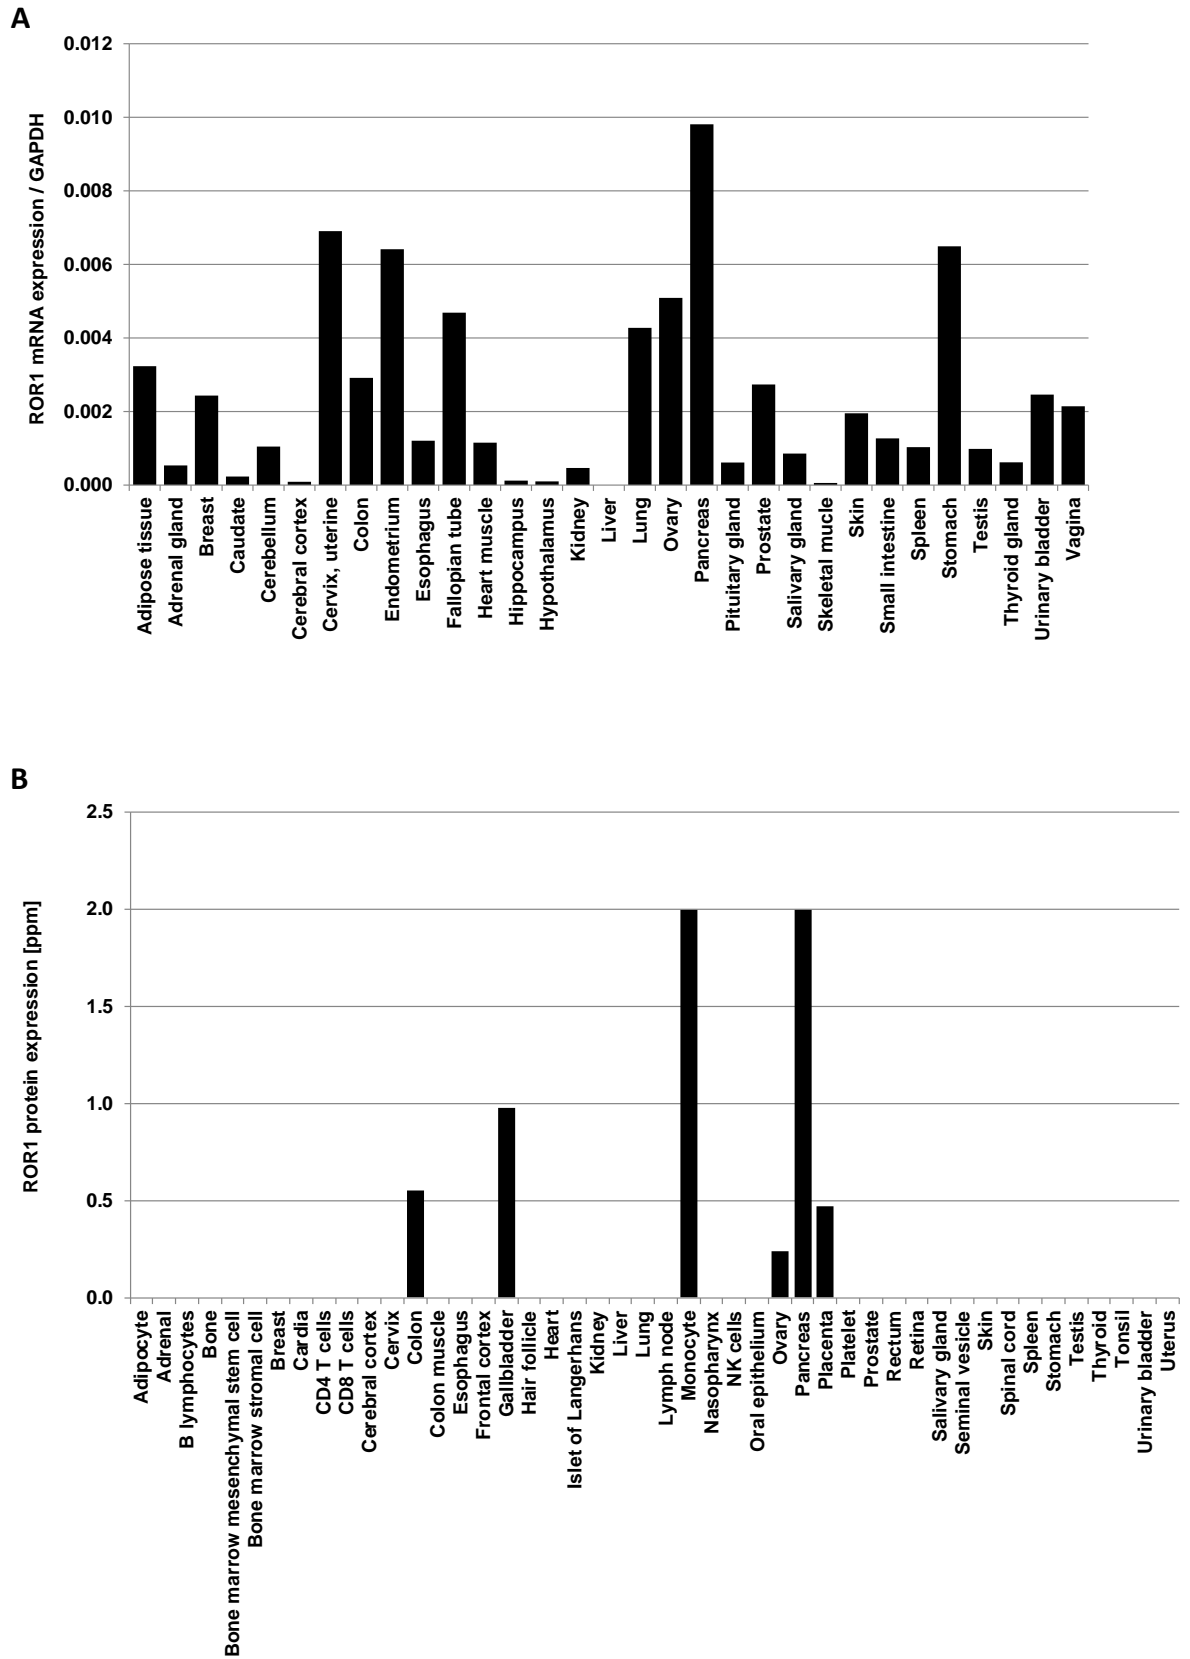

## Figure Legends

**Supplemental Figure 1.** ROR1 mRNA expression in normal B lymphocytes and CLL cells. In the GDS3902 DataSet Record of the Gene Expression Omnibus repository, ROR1 mRNA expression in CD19<sup>+</sup> B cells (immunomagnetically isolated from PBMCs of healthy donors) was compared with peripheral blood CLL cells. Expression data were normalized on median of control samples.

**Supplemental Figure 2.** ROR1 expression in normal human tissues. Data for ROR1 expression in normal human tissues was obtained from public databases. A) ROR1 mRNA expression in 31 tested human tissues is displayed relative to GAPDH mRNA. Values were generated within the Genotype-Tissue Expression (GTEx) project and downloaded from [www.proteinatlas.org](http://www.proteinatlas.org). RNA-sequencing data was reported as median reads per kilobase per million mapped reads (RPKM). B) ROR1 protein expression in 47 tested human tissues is given. GAPDH protein expression values range from 1196 to 5474 ppm in the respective tissues. Values were obtained from the Human Integrated Protein Expression Database within GeneCards ([www.genecards.org](http://www.genecards.org)) based on ProteomicsDB as data source. For further information on data normalization see [http://www.genecards.org/Guide/GeneCard#protein\\_expression](http://www.genecards.org/Guide/GeneCard#protein_expression).
