# Supplementary material
Source: PubMed Central journal article supplement (PMC5664409)
Supplement: 2017_167312-Disclosures_and_Contributions.pdf [file 2017_167312-Disclosures_and_Contributions.pdf]

Haematologica  
HAEMATOL/2017/167312  
Version 3

Mass spectrometry-based identification of a naturally presented  
receptor tyrosine kinase-like orphan receptor 1-derived epitope  
recognized by CD8<sup>+</sup> cytotoxic T cells

Falk Heidenreich, Elke Rücker-Braun, Juliane S. Walz, Anne Eugster,  
Denise Kühn, Sevina Dietz, Annika Nelde, Antje Tunger, Rebekka  
Wehner, Cornelia S. Link, Jan M. Middeke, Friedrich Stölzel, Torsten  
Tonn, Stefan Stevanovic, Hans-Georg Rammensee, Ezio Bonifacio,  
Michael Bachmann, Matthias Zeis, Gerhard Ehninger, Martin  
Bornhäuser, Johannes Schetelig, and Marc Schmitz

Disclosures: This work was supported by two grants from the Bundesministerium für  
Bildung und Forschung, by the ERC Advanced Grant 339842: MUTAEDITING and by the  
Graduiertenakademie TU Dresden.

Contributions: F.H. designed/performed experiments, analyzed data, and wrote the  
manuscript. E.R.B. assisted with experiments and edited the manuscript. J.S.W., A.E. and  
A.N. analyzed and/or interpreted data, and edited the manuscript. D.K., S.D., A.T. and  
R.W. performed and/or assisted with experiments. C.S.L., J.M.M. and F.S. enrolled  
patients, and/or edited the manuscript. T.T., E.B., H.G.R., M.P.B., G.E. and M.B. assisted  
with designing experiments and/or edited the manuscript. S.S., M.Z. assisted with  
designing experiments and/or performed experiments. J.S. and M.S. designed  
experiments, supervised the project and wrote the manuscript.
